# Supplementary material
Source: HighWire-hosted journal article supplement (https://www.cmajopen.ca/highwire/filestream/88926/field_highwire_adjunct_files/2/open-2022-0118-3-at.pdf)
Supplement: open-2022-0118-3-at.pdf [file open-2022-0118-3-at.pdf]

**Appendix 3**–Variables measured in the year before IBD diagnosis and evaluated as potential confounding variables.

|                                                                                                                           | Population group          |                                   |                           |
|---------------------------------------------------------------------------------------------------------------------------|---------------------------|-----------------------------------|---------------------------|
|                                                                                                                           | Matched cohort<br>[n=696] | General<br>population<br>[n= 580] | First Nations<br>[n= 116] |
| <b>Comorbidity Index, No. [%]</b>                                                                                         |                           |                                   |                           |
| 0                                                                                                                         | 509 [73.1]                | 429 [74.0]                        | 80 [69.0]                 |
| ≥1                                                                                                                        | 187 [26.9]                | 151 [26.0]                        | 36 [31.0]                 |
| <b>Visits with a general practitioner a year before diagnosis, No. [%]</b>                                                |                           |                                   |                           |
| ≤ 4                                                                                                                       | 223 [32.0]                | 195 [33.6]                        | 28 [24.1]                 |
| ≥ 5                                                                                                                       | 473 [68.0]                | 385 [66.4]                        | 88 [75.9]                 |
| <b>Visits to a specialist [specifically to a rheumatologist, ophthalmologist, surgeon, or gastroenterologist] No. [%]</b> |                           |                                   |                           |
| No                                                                                                                        | 423 [60.8]                | 360 [62.1]                        | 63 [54.3]                 |
| Yes                                                                                                                       | 273 [39.2]                | 220 [37.9]                        | 53 [45.7]                 |
| <b>IBD medication prescription claim a year before diagnosis, No. [%]</b>                                                 |                           |                                   |                           |
| No                                                                                                                        | 549 [78.9]                | 448 [77.2]                        | 101 [87.1]                |
| Yes                                                                                                                       | 147 [21.1]                | 132 [22.8]                        | 15 [12.9]                 |
| <b>Corticosteroid dependency a year before diagnosis, No. [%]</b>                                                         |                           |                                   |                           |
| No                                                                                                                        | 672 [96.6]                | *                                 | *                         |
| Yes                                                                                                                       | 24 [3.4]                  | *                                 | *                         |
| <b>Corticosteroid prescription claim a year before diagnosis, No. [%]</b>                                                 |                           |                                   |                           |
| No                                                                                                                        | 638 [91.7]                | 530 [91.4]                        | 108 [93.1]                |
| Yes                                                                                                                       | 58 [8.3]                  | 50 [8.6]                          | 8 [6.9]                   |

\* Data not available due to small cell value, specifically the number of First Nations with corticosteroid dependency before the date of diagnosis

Appendix 3, as supplied by the authors. Appendix to: Marques Santos JD, Fowler S, Jennings D, et al. Health care utilization differences between First Nations people and the general population with inflammatory bowel disease: a retrospective cohort study from Saskatchewan, Canada. CMAJ Open 2022. doi:10.9778/cmajo.20220118.

Copyright © 2022 The Author(s) or their employer(s). To receive this resource in an accessible format, please contact us at [cmajgroup@cmaj.ca](mailto:cmajgroup@cmaj.ca).
